# Supplementary material
Source: PubMed Central journal article supplement (PMC2717868)

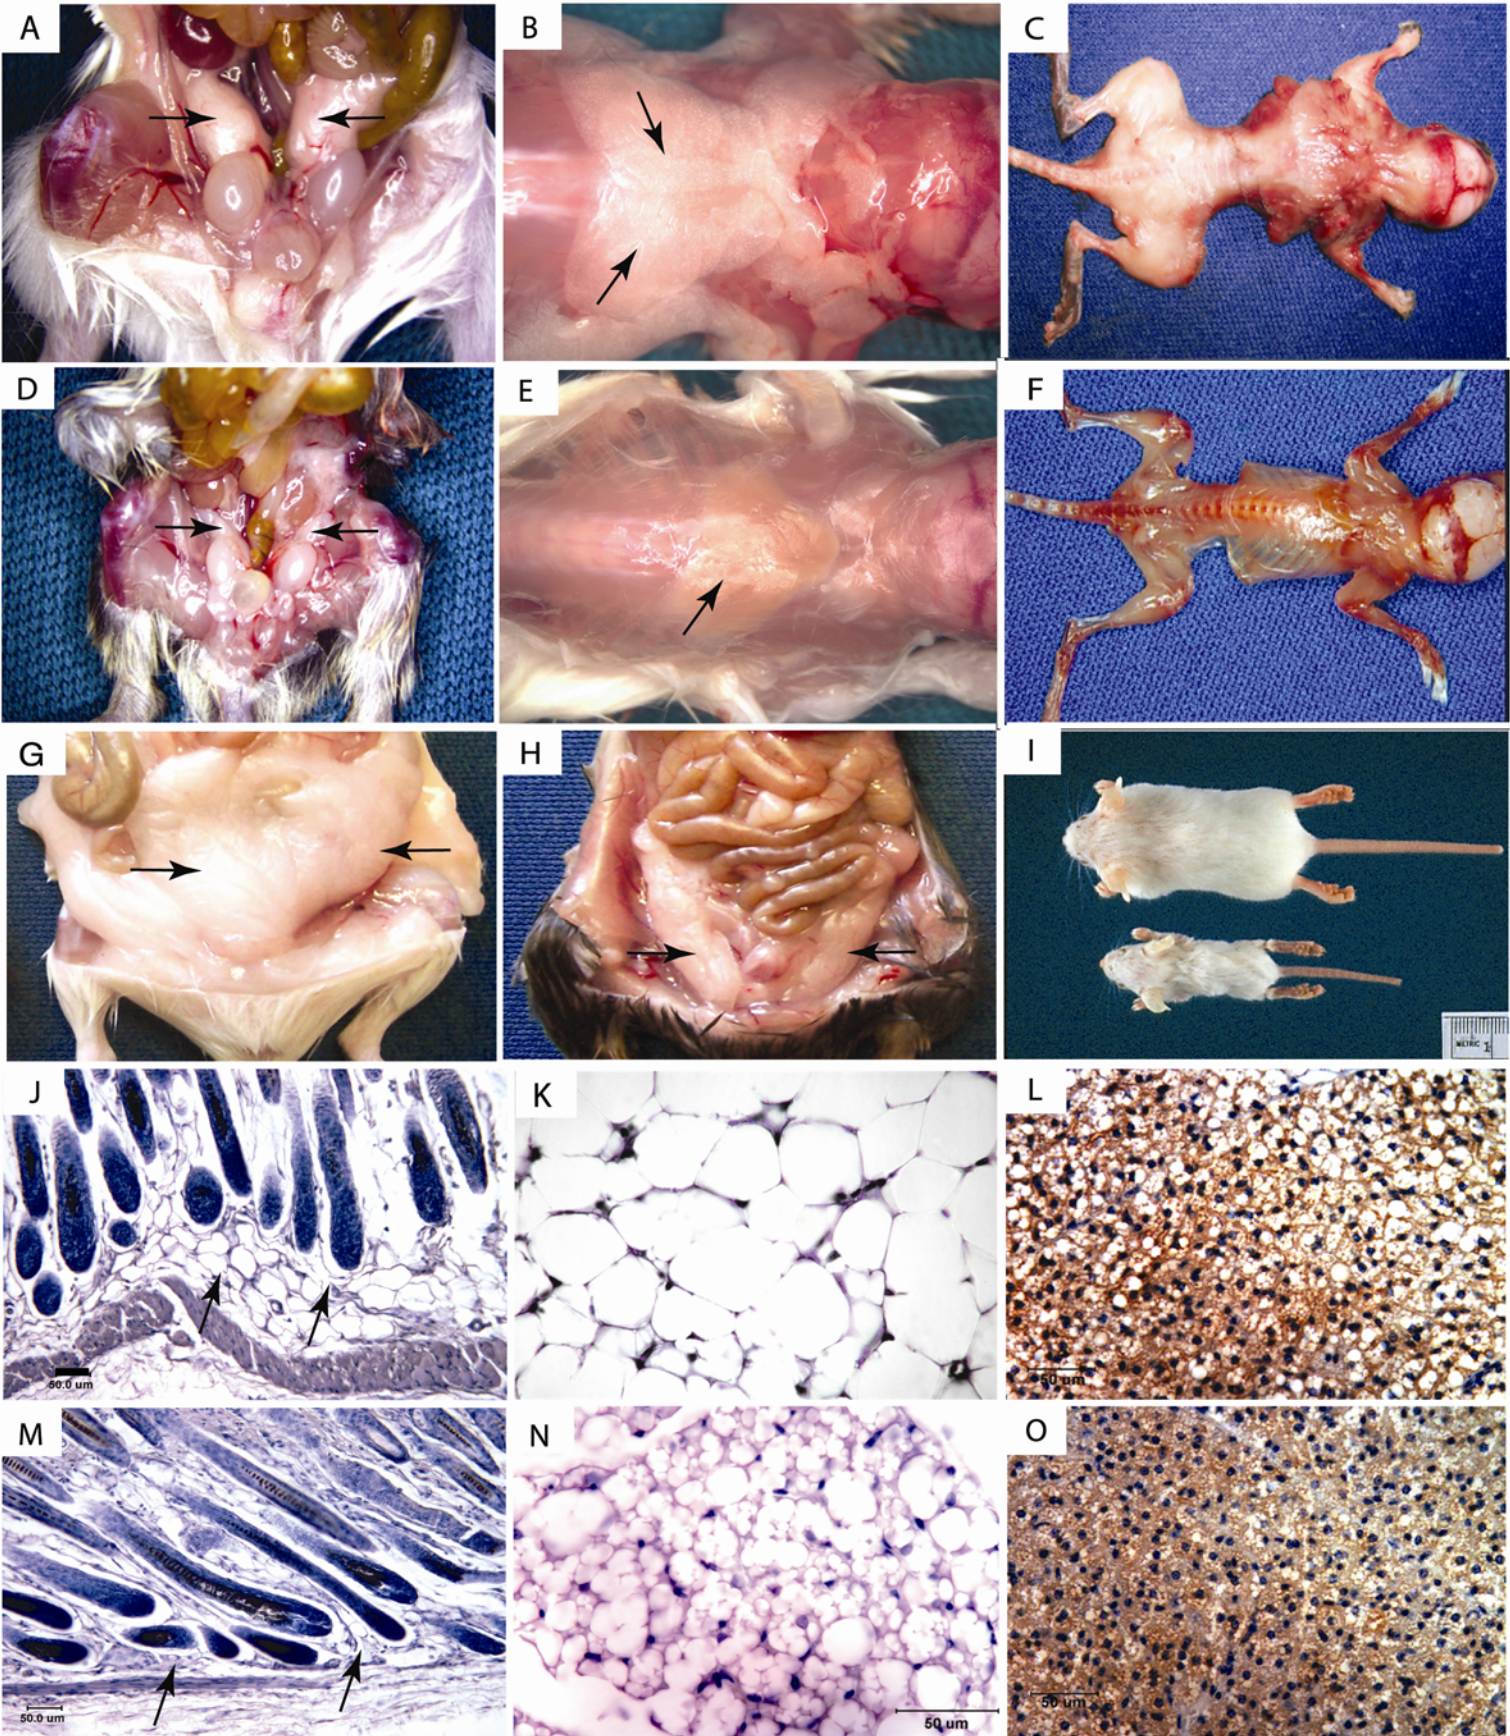

Supplement: en.2008-0922_1.pdf [file en.2008-0922_1.pdf]

**A**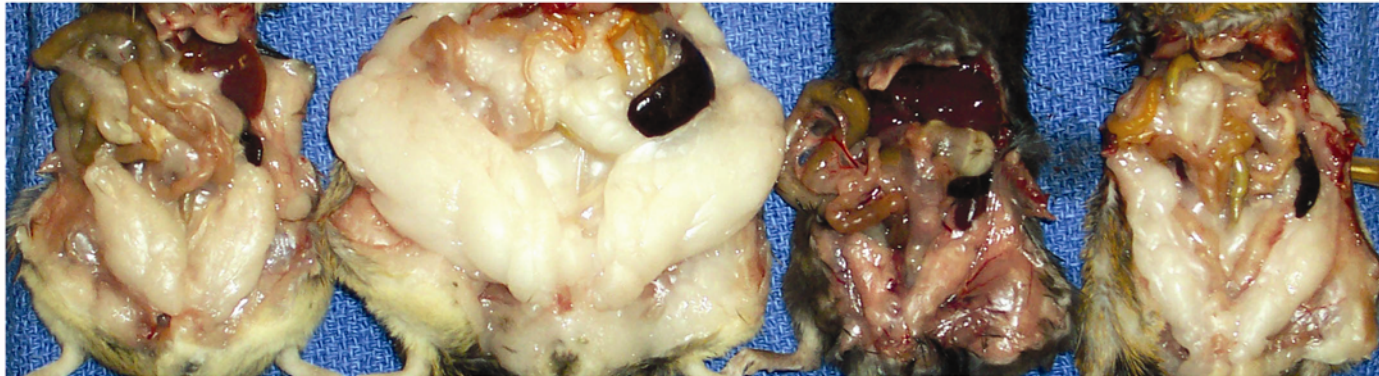

WT RD

WT HFD

BK/BK RD

BK/BK HFD

**B**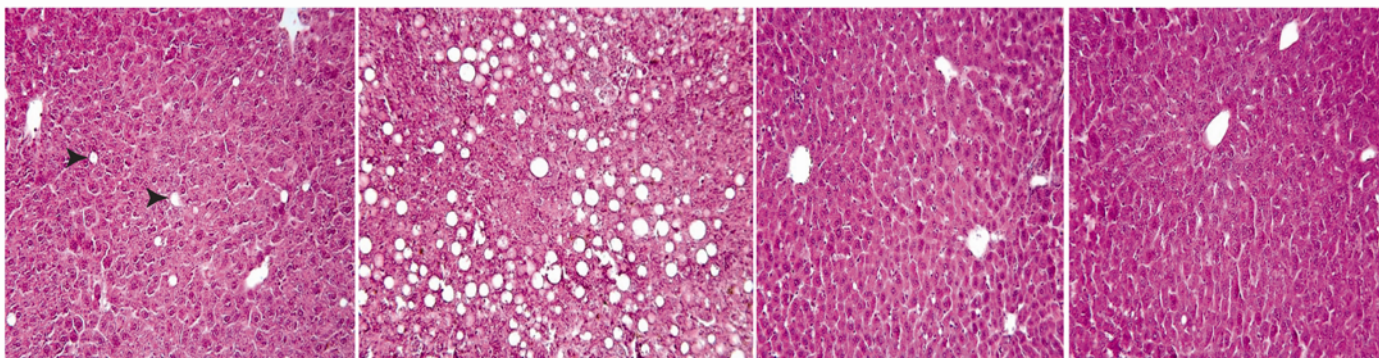

Supplement: en.2008-0922_2.pdf [file en.2008-0922_2.pdf]

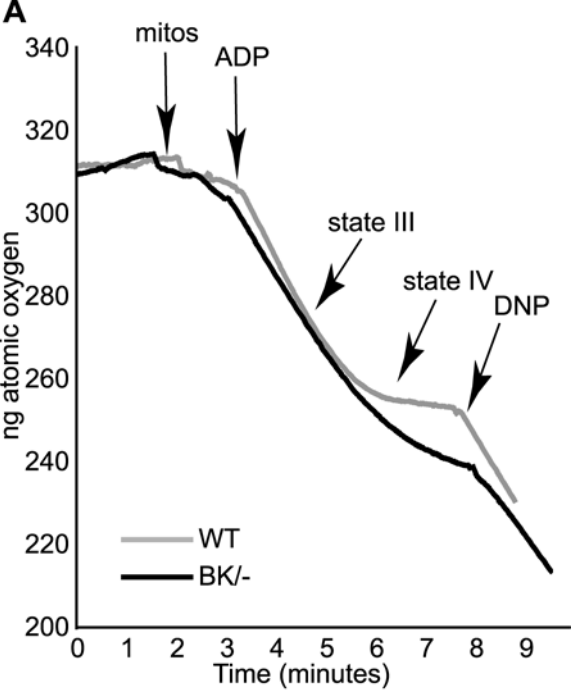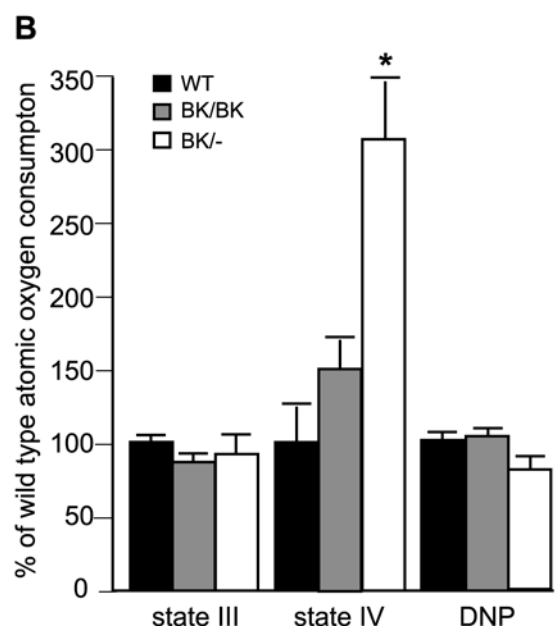

Supplement: en.2008-0922_3.pdf [file en.2008-0922_3.pdf]
